# Supplementary material for: Longitudinal plasma phosphorylated tau 181 tracks disease progression in Alzheimer’s disease
Source: PubMed Central journal article supplement (PMC8197760; doi:10.1038/s41398-021-01476-7), 2021-06-12
Supplement: 41398_2021_1476_MOESM1_ESM.pdf [file 41398_2021_1476_MOESM1_ESM.pdf]

# Appendix

## Content

|                                                                                                                                                |    |
|------------------------------------------------------------------------------------------------------------------------------------------------|----|
| eTable 1. Baseline participant demographics by diagnosis and A $\beta$ status .....                                                            | 2  |
| eTable 2. Baseline participant demographics by ATN profiles .....                                                                              | 4  |
| eTable 3. Baseline levels and longitudinal changes of plasma p-tau181 by clinical diagnosis. ....                                              | 6  |
| eTable 4. Baseline levels and longitudinal changes of plasma p-tau181 in different diagnostic groups and A $\beta$ status. ....                | 7  |
| eTable 5. Comparisons of baseline levels and longitudinal changes of plasma p-tau181 in different diagnostic groups and A $\beta$ status ..... | 7  |
| eTable 6. Baseline levels and longitudinal changes of plasma p-tau181 by ATN classification. ....                                              | 8  |
| eTable 7. Comparisons of baseline levels and longitudinal changes of plasma p-tau181 between different ATN groups.....                         | 8  |
| eTable 8. Baseline levels and longitudinal changes of plasma p-tau181 by A $\beta$ , Tau, or Neurodegeneration.....                            | 8  |
| eTable 9. Association between plasma p-tau181 and other measures at baseline in different amyloid status.....                                  | 9  |
| eTable 10. Association between longitudinal plasma p-tau181 and other baseline measures in different amyloid status .....                      | 10 |
| eTable 11. Association between longitudinal plasma p-tau181 and other measures at baseline across diagnostic groups .....                      | 11 |
| eTable 12. Correlations of concurrent changes in plasma p-tau181 and other measures in different amyloid status. ....                          | 12 |
| eTable 13. Correlations of concurrent changes in plasma p-tau181 and other measures across diagnostic groups .....                             | 13 |

**eTable 1. Baseline participant demographics by diagnosis and A $\beta$  status**

|                                    | <b>A-CN(N=250)</b>  | <b>A+CN(N=123)</b> | <b>A-MCI(N=235)</b> | <b>A+MCI(N=291)</b> | <b>A-Dementia(N=27)</b> | <b>A+Dementia(N=169)</b> |
|------------------------------------|---------------------|--------------------|---------------------|---------------------|-------------------------|--------------------------|
| Age                                | 74.3(6.76)          | 75.2(6.27)         | 71.1(8.13)          | 73.9(7.38)          | 77.7(7.65)              | 74.7(7.57)               |
| Female sex, No. (%)                | 103(52.0)           | 58(57.4)           | 105(50.5)           | 95(37.4)            | 3(15.0)                 | 60(43.2)                 |
| Education, year                    | 16.5(2.65)          | 16.4(2.56)         | 16.2(2.54)          | 16.0(2.85)          | 16.7(2.32)              | 15.7(2.74)               |
| <b>APOE</b>                        |                     |                    |                     |                     |                         |                          |
| APOE $\epsilon$ 4-/-, No. (%)      | 160(80.8)           | 54(53.5)           | 156(75.0)           | 89(35.0)            | 16(80.0)                | 37(26.6)                 |
| APOE $\epsilon$ 4+/-, No. (%)      | 37(18.7)            | 40(39.6)           | 49(23.6)            | 122(48.0)           | 3(15.0)                 | 69(49.6)                 |
| APOE $\epsilon$ 4+/+, No. (%)      | 1(0.5)              | 7(6.9)             | 3(1.4)              | 43(16.9)            | 1(5.0)                  | 33(23.7)                 |
| Plasma p-tau, pg/mL                | 14.2(10.1)          | 17.3(8.53)         | 14.2(9.52)          | 21.7(11.5)          | 18.3(12.11)             | 24.3(7.59)               |
| <b>CSF biomarkers</b>              |                     |                    |                     |                     |                         |                          |
| A $\beta$ 42, pg/mL                | 1702.5(502.9)       | 703.6(192.0)       | 1567.2(488.4)       | 676.7(168.6)        | 1642.8(599.6)           | 588.3(165.2)             |
| p-tau, pg/mL                       | 8.08(0.58)          | 11.4(1.14)         | 10.7(0.74)          | 15.2(0.96)          | 16.3(3.65)              | 15.9(1.35)               |
| t-tau, pg/mL                       | 241.1(85.7)         | 244.9(100.2)       | 236.8(100.0)        | 303(137.7)          | 336.1(162.8)            | 380.8(151.6)             |
| <b>PET imaging</b>                 |                     |                    |                     |                     |                         |                          |
| A $\beta$ -PET                     | 1.04(0.11)          | 1.26(0.19)         | 1.05(0.12)          | 1.34(0.20)          | 1.03(0.15)              | 1.43(0.18)               |
| FDG-PET                            | 1.32(0.11)          | 1.28(0.11)         | 1.31(0.12)          | 1.22(0.13)          | 1.18(0.18)              | 1.05(0.14)               |
| <b>Structure imaging (volume)*</b> |                     |                    |                     |                     |                         |                          |
| Hippocampal, mm <sup>3</sup>       | 7445.5(962.8)       | 7354.4(843.2)      | 7337.4(1139.0)      | 6764.9(1000.6)      | 5530.0(1454.9)          | 5838.8(959.2)            |
| Entorhinal, mm <sup>3</sup>        | 3818.0(648.2)       | 3768.0(546.0)      | 3729.5(709.5)       | 3549.0(720.4)       | 3122.4(802.0)           | 2816.5(682.3)            |
| Mid temporal, mm <sup>3</sup>      | 20477.8(2710.8)     | 20230.5(2489.0)    | 20686.4(2633.1)     | 19959.0(2759.9)     | 18599.5(2724.0)         | 17346.1(3166.6)          |
| Ventricular, mm <sup>3</sup>       | 31589.0(15632.4)    | 39360.8(22979.6)   | 32827.9(19965.5)    | 42921.7(23402.4)    | 46624.9(22769.5)        | 51169.3(23784.8)         |
| Whole brain, mm <sup>3</sup>       | 1038807.3(108427.9) | 1036167.1(94303.7) | 1055963.0(107969.5) | 1048877.1(103162.3) | 990299.0(108411.0)      | 993731.4(119231.8)       |
| <b>Cognitive measures</b>          |                     |                    |                     |                     |                         |                          |
| MMSE                               | 29.1(1.20)          | 29.0(1.33)         | 28.5(1.50)          | 27.7(1.82)          | 23.0(3.41)              | 22.3(3.36)               |
| CDR-SB                             | 0.054(0.21)         | 0.12(0.33)         | 1.27(0.78)          | 1.66(1.12)          | 4.73(2.21)              | 5.17(2.37)               |
| ADAS-Cog                           | 5.71(3.03)          | 6.07(3.08)         | 7.58(3.61)          | 10.5(4.56)          | 17.9(7.05)              | 21.9(8.19)               |
| Memory                             | 1.11(0.57)          | 0.97(0.64)         | 0.67(0.66)          | 0.11(0.62)          | -0.77(0.63)             | -0.99(0.56)              |
| EF                                 | 0.96(0.82)          | 0.63(0.80)         | 0.64(0.83)          | 0.12(0.84)          | -0.71(1.04)             | -0.93(0.94)              |
| Language                           | 0.84(0.72)          | 0.75(0.70)         | 0.52(0.75)          | 0.17(0.74)          | -0.58(0.99)             | -0.83(1.00)              |
| VS                                 | 0.22(0.58)          | 0.19(0.60)         | 0.12(0.68)          | -0.11(0.73)         | -0.45(0.81)             | -0.60(1.01)              |

**Plasma p-tau, No. of samples**

Month

|    |     |     |     |     |    |     |
|----|-----|-----|-----|-----|----|-----|
| 0  | 250 | 123 | 235 | 261 | 27 | 169 |
| 12 | 198 | 90  | 210 | 219 | 16 | 119 |
| 24 | 215 | 92  | 190 | 173 | 6  | 49  |
| 36 | 53  | 28  | 168 | 72  | 3  | 16  |
| 48 | 72  | 35  | 98  | 0   | 2  | 9   |
| 60 | 0   | 0   | 3   | 0   | 0  | 0   |
| 72 | 2   | 0   | 2   | 0   | 0  | 0   |
| 84 | 3   | 0   | 0   | 0   | 0  | 0   |
| 96 | 1   | 0   | 0   | 0   | 0  | 0   |

---

Continuous variables were expressed as mean (SD) and categorical variables as number (%). Abbreviation: CN = cognitively normal; CSF = cerebrospinal fluid; EF = executive function; FDG = fluorodeoxyglucose; MCI = mild cognitive impairment; PET = positron emission tomography; p-tau = phosphorylated tau; t-tau = total tau; MMSE = mini-mental state examination; VS = visuospatial;

\*Structure imaging measures reported here are unadjusted by total intracranial volume.

**eTable 2. Baseline participant demographics by ATN profiles**

|                                    | A-T-N-(N=331)    | A-T-N+(N=13)     | A-T+N-(N=5)      | A-T+N+(N=77)     | A+T-N-(N=223)    | A+T-N+(N=3)      | A+T+N-(N=41)     | A+T+N+(N=227)    |
|------------------------------------|------------------|------------------|------------------|------------------|------------------|------------------|------------------|------------------|
| Age                                | 71.6(7.42)       | 74.0(8.50)       | 74.7(7.38)       | 75.3(7.27)       | 73.2(7.17)       | 81.9(9.94)       | 75.9(7.25)       | 74.1(7.14)       |
| Female sex, No. (%)                | 161(48.6)        | 9(69.2)          | 2(40.0)          | 39(50.6)         | 82(36.8)         | 1(33.3)          | 10(24.4)         | 120(52.9)        |
| Education, year                    | 16.3(2.58)       | 14.9(2.82)       | 17.8(2.28)       | 16.6(2.36)       | 16.4(2.69)       | 16.3(6.35)       | 16.4(2.58)       | 15.7(2.67)       |
| <b>APOE</b>                        |                  |                  |                  |                  |                  |                  |                  |                  |
| APOE $\epsilon$ 4-/-, No. (%)      | 269(81.3)        | 11(84.6)         | 4(80.0)          | 48(62.3)         | 100(44.8)        | 1(33.3)          | 16(39.0)         | 63(27.8)         |
| APOE $\epsilon$ 4+/-, No. (%)      | 59(17.8)         | 2(15.4)          | 1(20.0)          | 27(35.1)         | 94(42.2)         | 2(66.7)          | 17(41.5)         | 118(52.0)        |
| APOE $\epsilon$ 4+/+, No. (%)      | 3(0.9)           | 0(0.0)           | 0(0.0)           | 2(2.6)           | 29(13.0)         | 0(0.0)           | 8(19.5)          | 46(20.3)         |
| Plasma p-tau, pg/mL                | 13.3(8.78)       | 17.2(16.4)       | 21.6(10.1)       | 23.5(50.8)       | 18.1(9.80)       | 19.8(3.79)       | 23.6(11.5)       | 24.3(10.9)       |
| <b>CSF biomarkers</b>              |                  |                  |                  |                  |                  |                  |                  |                  |
| A $\beta$ 42, pg/mL                | 1598.2(423.9)    | 1890.7(533.4)    | 1324.9(569.4)    | 1758.9(732.0)    | 657.5(189.3)     | 598.8(333.1)     | 592.2(161.3)     | 670.1(165.2)     |
| p-tau, pg/mL                       | 17.7(4.27)       | 25.6(1.09)       | 28.4(0.87)       | 37.6(12.6)       | 18.6(5.21)       | 23.2(5.77)       | 29.0(1.76)       | 44.0(13.2)       |
| t-tau, pg/mL                       | 203.1(46.5)      | 311.4(11.6)      | 288.5(6.27)      | 404.7(108.4)     | 198.5(52.0)      | 319.9(15.4)      | 281.5(15.4)      | 432.9(120.8)     |
| <b>PET imaging</b>                 |                  |                  |                  |                  |                  |                  |                  |                  |
| A $\beta$ -PET                     | 1.03(0.08)       | 1.04(0.09)       | 1.25(0.17)       | 1.15(0.19)       | 1.26(0.20)       | 1.42(0.19)       | 1.43(0.17)       | 1.44(0.17)       |
| FDG-PET                            | 1.33(0.11)       | 1.32(0.17)       | 1.30(0.04)       | 1.26(0.13)       | 1.23(0.15)       | 1.18(0.15)       | 1.20(0.13)       | 1.15(0.16)       |
| <b>Structure imaging (volume)*</b> |                  |                  |                  |                  |                  |                  |                  |                  |
| Hippocampal, mm <sup>3</sup>       | 7441.8(1062.6)   | 6455.4(1312.9)   | 7019.3(1621.9)   | 7034.4(1291.5)   | 7046.4(1051.2)   | 5599.0(94.8)     | 6663.3(887.0)    | 6333.6(1059.4)   |
| Entorhinal, mm <sup>3</sup>        | 3821.1(662.3)    | 3539.3(501.8)    | 3770.5(499.6)    | 3584.3(814.1)    | 3622.2(718.0)    | 3986.3(1387.5)   | 3477.2(749.4)    | 3241.3(762.5)    |
| Mid temporal, mm <sup>3</sup>      | 20734.1(2701.0)  | 19451.6(2149.0)  | 21243.0(4084.0)  | 19982.8(2463.6)  | 20549.6(2618.6)  | 18801.0(4478.9)  | 19956.7(2984.9)  | 18410.0(3103.7)  |
| Ventricular, mm <sup>3</sup>       | 31382.5(16784.6) | 32422.0(23927.0) | 32582.0(12839.9) | 31191.3(16858.2) | 47799.0(25409.8) | 48717.3(33871.7) | 50927.3(22266.9) | 38746.5(19207.7) |
| Whole brain, mm <sup>3</sup>       | 1054183(108762)  | 1018169(99059)   | 1052187(117408)  | 1031469(110363)  | 1059295(103121)  | 1017311(157467)  | 1062114(115543)  | 1012343(105292)  |
| <b>Cognitive measures</b>          |                  |                  |                  |                  |                  |                  |                  |                  |
| MMSE                               | 28.6(1.58)       | 28.1(2.18)       | 29.2(0.84)       | 28.1(2.14)       | 27.5(2.81)       | 25.7(5.13)       | 26.5(3.46)       | 25.5(3.40)       |
| CDR-SB                             | 0.80(1.17)       | 1.35(2.26)       | 1.30(0.76)       | 0.92(1.30)       | 1.56(1.80)       | 2.17(2.89)       | 2.51(2.52)       | 2.91(2.40)       |
| ADAS-Cog                           | 6.87(3.82)       | 8.26(6.44)       | 7.60(2.61)       | 7.92(4.82)       | 10.2(6.45)       | 14.0(8.66)       | 13.2(8.65)       | 15.3(8.41)       |
| Memory                             | 0.89(0.69)       | 0.69(0.76)       | 0.63(0.80)       | 0.63(0.82)       | 0.28(0.82)       | -0.09(0.62)      | -0.07(0.81)      | -0.32(0.89)      |
| EF                                 | 0.82(0.86)       | 0.60(0.86)       | 0.68(0.68)       | 0.59(0.96)       | 0.21(1.01)       | -0.04(1.82)      | -0.11(0.98)      | -0.32(1.01)      |
| Language                           | 0.65(0.77)       | 0.63(0.69)       | 0.39(0.76)       | 0.58(0.82)       | 0.31(0.89)       | 0.57(1.11)       | -0.13(0.89)      | -0.25(0.97)      |
| VS                                 | 0.16(0.65)       | -0.08(0.88)      | 0.32(0.85)       | 0.07(0.67)       | -0.03(0.78)      | 0.14(0.98)       | -0.31(0.72)      | -0.31(0.93)      |

**Plasma p-tau, No. of samples**

| Month |     |    |   |    |     |   |    |     |  |
|-------|-----|----|---|----|-----|---|----|-----|--|
| 0     | 331 | 13 | 5 | 77 | 223 | 3 | 41 | 227 |  |
| 12    | 264 | 8  | 5 | 58 | 179 | 3 | 30 | 12  |  |
| 24    | 262 | 9  | 5 | 58 | 147 | 3 | 24 | 24  |  |
| 36    | 150 | 3  | 4 | 27 | 84  | 1 | 16 | 80  |  |
| 48    | 114 | 5  | 4 | 24 | 49  | 0 | 8  | 36  |  |
| 60    | 3   | 0  | 2 | 0  | 0   | 0 | 0  | 0   |  |
| 72    | 3   | 1  | 0 | 0  | 0   | 0 | 0  | 0   |  |
| 84    | 3   | 1  | 0 | 0  | 0   | 0 | 0  | 0   |  |
| 96    | 0   | 1  | 0 | 0  | 0   | 0 | 0  | 0   |  |

---

Continuous variables were expressed as mean (SD) and categorical variables as number (%). Abbreviation: CN = cognitively normal; CSF = cerebrospinal fluid; EF = executive function; FDG = fluorodeoxyglucose; MCI = mild cognitive impairment; PET = positron emission tomography; p-tau = phosphorylated tau; t-tau = total tau; MMSE = mini-mental state examination; VS = visuospatial;

\*Structure imaging measures reported here are unadjusted by total intracranial volume.

**eTable 3. Baseline levels and longitudinal changes of plasma p-tau181 by clinical diagnosis.**

|                           | <b>CN</b>           | <b>MCI</b>          | <b>Dementia</b>     | <b>CN vs MCI</b>            | <b>CN vs Dementia</b>       | <b>MCI vs Dementia</b>       |
|---------------------------|---------------------|---------------------|---------------------|-----------------------------|-----------------------------|------------------------------|
| <b>Intercept</b>          | 15.1                | 18.3                | 24.1                | -2.39                       | -6.54                       | -3.70                        |
| <b>Intercept, p-value</b> | <b>&lt;0.001</b>    | <b>&lt;0.001</b>    | <b>&lt;0.001</b>    | <b>&lt;0.001(&lt;0.001)</b> | <b>&lt;0.001(&lt;0.001)</b> | <b>&lt;0.001 (&lt;0.001)</b> |
| <b>Slope</b>              | 0.52                | 0.45                | 1.08                | 0.060                       | -0.58                       | -0.64                        |
| <b>Slope, p-value</b>     | <b>0.003(0.005)</b> | <b>0.001(0.003)</b> | <b>0.004(0.004)</b> | 0.783(0.783)                | 0.188(0.282)                | 0.131(0.393)                 |

Linear mixed-effect models showing effects of clinical diagnosis on plasma p-tau181 at baseline (intercept, pg/mL) and over time (slope, pg/mL per month). Comparisons were adjusted for age, gender, APOE4 status, and educational years. P-values are reported together with P-values adjusted for multiple comparisons (Benjamini-Hochberg). Abbreviations: CN = cognitively normal; MCI = mild cognitive impairment;

**eTable 4. Baseline levels and longitudinal changes of plasma p-tau181 in different diagnostic groups and A $\beta$  status.**

|                  | A-CN                | A+CN                | A-MCI               | A+MCI               | A-Dementia          | A+Dementia          |
|------------------|---------------------|---------------------|---------------------|---------------------|---------------------|---------------------|
| <b>Intercept</b> | 13.870              | 17.047              | 14.230              | 21.560              | 18.643              | 24.767              |
| <b>P</b>         | <b>&lt;0.001</b>    | <b>&lt;0.001</b>    | <b>&lt;0.001</b>    | <b>&lt;0.001</b>    | <b>&lt;0.001</b>    | <b>&lt;0.001</b>    |
| <b>Slope</b>     | 0.043               | 0.075               | 0.041               | 0.035               | 0.242               | 0.092               |
| <b>P</b>         | <b>0.021(0.025)</b> | <b>0.007(0.040)</b> | <b>0.012(0.037)</b> | <b>0.036(0.036)</b> | <b>0.014(0.028)</b> | <b>0.017(0.026)</b> |

Linear mixed-effect models showing effects of diagnosis and A $\beta$  status on plasma p-tau181 at baseline (intercept, pg/mL) and over time (slope, pg/mL per month).

Abbreviations: A+ = positive  $\beta$ -amyloid status; A- = negative  $\beta$ -amyloid status; CN = cognitively normal; MCI = mild cognitive impairment;

**eTable 5. Comparisons of baseline levels and longitudinal changes of plasma p-tau181 in different diagnostic groups and A $\beta$  status**

|                  | Within A+ groups    |                             |                             | Within A- groups    |                    |               | Within each diagnostic group |                             |                     |
|------------------|---------------------|-----------------------------|-----------------------------|---------------------|--------------------|---------------|------------------------------|-----------------------------|---------------------|
|                  | A+Dementia vs A+MCI | A+Dementia vs A+CN          | A+MCI vs A+CN               | A-Dementia vs A-MCI | A-Dementia vs A-CN | A-MCI vs A-CN | A+Dementia vs A-Dementia     | A+MCI vs A-MCI              | A+CN vs A-CN        |
| <b>Intercept</b> | 2.609               | 6.672                       | 4.063                       | 2.611               | 3.582              | 0.972         | 5.321                        | 5.323                       | 2.231               |
| <b>P values</b>  | <b>0.004(0.010)</b> | <b>&lt;0.001(&lt;0.001)</b> | <b>&lt;0.001(&lt;0.001)</b> | 0.178(0.200)        | 0.063(0.081)       | 0.250(0.250)  | <b>0.008(0.0143)</b>         | <b>&lt;0.001(&lt;0.001)</b> | <b>0.031(0.047)</b> |
| <b>Slope</b>     | 0.057               | 0.017                       | -0.040                      | 0.201               | 0.199              | -0.002        | -0.151                       | -0.006                      | 0.032               |
| <b>P values</b>  | 0.174(0.391)        | 0.723(0.929)                | 0.212(0.381)                | 0.043(0.392)        | 0.047(0.210)       | 0.936(0.936)  | 0.154(0.461)                 | 0.786(0.884)                | 0.340(0.510)        |

Comparisons between groups were derived from the linear mixed-effect models adjusting for age, gender, APOE4 status, and educational years. P-values are reported together with P-values adjusted for multiple comparisons (Benjamini-Hochberg). Abbreviations: A+ = positive  $\beta$ -amyloid status; A- = negative  $\beta$ -amyloid status; CN = cognitively normal; MCI = mild cognitive impairment.

**eTable 6. Baseline levels and longitudinal changes of plasma p-tau181 by ATN classification.**

|                  | A-T-N-                      | A+T-N-                      | A+T+N-                      | A+T+N+                      |
|------------------|-----------------------------|-----------------------------|-----------------------------|-----------------------------|
| <b>Intercept</b> | 13.160                      | 18.180                      | 23.307                      | 24.100                      |
| <b>P</b>         | <b>&lt;0.001(&lt;0.001)</b> | <b>&lt;0.001(&lt;0.001)</b> | <b>&lt;0.001(&lt;0.001)</b> | <b>&lt;0.001(&lt;0.001)</b> |
| <b>Slope</b>     | 0.035                       | 0.060                       | 0.017                       | 0.042                       |
| <b>P</b>         | <b>0.011(0.022)</b>         | <b>0.002(0.008)</b>         | 0.723(0.723)                | <b>0.039(0.052)</b>         |

Linear mixed-effect models showing plasma p-tau181 at baseline (intercept, pg/mL) and over time (slope, pg/mL per month) in ATN groups of normal AD biomarkers (A-T-N-), Alzheimer's pathologic change (A+T-N-), and Alzheimer's disease (A+T+N- and A+T+N+). Abbreviations: AD = Alzheimer's disease; A+ = positive  $\beta$ -amyloid status; A- = negative  $\beta$ -amyloid status.

**eTable 7. Comparisons of baseline levels and longitudinal changes of plasma p-tau181 between different ATN groups**

|                  | A+T-N-<br>vs A-T-N-         | A+T+N-<br>vs A-T-N-         | A+T+N+<br>vs A-T-N-         | A+T+N-<br>vs A+T+N- | A+T+N+<br>vs A+T+N-         | A+T+N+<br>vs A+T+N- |
|------------------|-----------------------------|-----------------------------|-----------------------------|---------------------|-----------------------------|---------------------|
| <b>Intercept</b> | 3.547                       | 7.674                       | 8.974                       | 4.127               | 5.426                       | 1.300               |
| <b>P</b>         | <b>&lt;0.001(&lt;0.001)</b> | <b>&lt;0.001(&lt;0.001)</b> | <b>&lt;0.001(&lt;0.001)</b> | <b>0.007(0.009)</b> | <b>&lt;0.001(&lt;0.001)</b> | 0.399(0.399)        |
| <b>Slope</b>     | 0.025                       | -0.017                      | 0.007                       | -0.043              | -0.018                      | 0.025               |
| <b>P</b>         | 0.309(1.000)                | 0.732(0.879)                | 0.782(0.782)                | 0.422(1.000)        | 0.542(1.000)                | 0.646(0.968)        |

Comparisons between groups were derived from the linear mixed-effect models adjusting for age, gender, APOE4 status, and educational years. P-values are reported together with P-values adjusted for multiple comparisons (Benjamini-Hochberg). Abbreviations: A =  $\beta$ -amyloid status; T = tau status; N = neurodegeneration status.

**eTable 8. Baseline levels and longitudinal changes of plasma p-tau181 by A $\beta$ , Tau, or Neurodegeneration.**

|                  | A-               | A+               | A+ vs A-         | T-               | T+               | T+ vs T-         | N-               | N+               | N+ vs N-         |
|------------------|------------------|------------------|------------------|------------------|------------------|------------------|------------------|------------------|------------------|
| <b>Intercept</b> | 14.150           | 21.330           | 5.110            | 15.172           | 22.663           | 5.763            | 15.777           | 22.209           | 4.875            |
| <b>P</b>         | <b>&lt;0.001</b> | <b>&lt;0.001</b> | <b>&lt;0.001</b> | <b>&lt;0.001</b> | <b>&lt;0.001</b> | <b>&lt;0.001</b> | <b>&lt;0.001</b> | <b>&lt;0.001</b> | <b>&lt;0.001</b> |
| <b>Slope</b>     | 0.045            | 0.049            | 0.004            | 0.048            | 0.043            | -0.005           | 0.040            | 0.058            | 0.017            |
| <b>P</b>         | <b>0.001</b>     | <b>0.001</b>     | 0.828            | <b>0.000</b>     | <b>0.012</b>     | 0.793            | <b>0.001</b>     | <b>0.001</b>     | 0.406            |

Comparisons between groups were derived from the linear mixed-effect models adjusting for age, gender, APOE4 status, and educational years. Abbreviations: A =  $\beta$ -amyloid status; T = tau status; N = neurodegeneration status.



**eTable 9. Association between plasma p-tau181 and other measures at baseline in different amyloid status**

|                                   | A-      |       |                     | A+    |         |       |                             |       |
|-----------------------------------|---------|-------|---------------------|-------|---------|-------|-----------------------------|-------|
|                                   | $\beta$ | s.e.  | P value             | R2    | $\beta$ | s.e.  | P value                     | R2    |
| <b>CSF biomarkers</b>             |         |       |                     |       |         |       |                             |       |
| A $\beta$ 42                      | -0.029  | 0.074 | 0.697(0.741)        | 0.028 | -0.127  | 0.091 | 0.161(0.161)                | 0.114 |
| p-tau                             | 0.199   | 0.071 | <b>0.005(0.043)</b> | 0.117 | 0.693   | 0.085 | <b>&lt;0.001(&lt;0.001)</b> | 0.217 |
| t-tau                             | 0.185   | 0.070 | <b>0.009(0.051)</b> | 0.121 | 0.639   | 0.086 | <b>&lt;0.001(&lt;0.001)</b> | 0.207 |
| <b>PET imaging</b>                |         |       |                     |       |         |       |                             |       |
| A $\beta$ -PET                    | 0.140   | 0.066 | <b>0.036(0.151)</b> | 0.070 | 0.683   | 0.082 | <b>&lt;0.001(&lt;0.001)</b> | 0.177 |
| FDG-PET                           | -0.059  | 0.066 | 0.367(0.521)        | 0.098 | -0.595  | 0.086 | <b>&lt;0.001(&lt;0.001)</b> | 0.095 |
| <b>Structure imaging (volume)</b> |         |       |                     |       |         |       |                             |       |
| Hippocampal                       | -0.116  | 0.063 | 0.067(0.19)         | 0.264 | -0.402  | 0.084 | <b>&lt;0.001(&lt;0.001)</b> | 0.202 |
| Entorhinal                        | -0.112  | 0.073 | 0.128(0.242)        | 0.043 | -0.433  | 0.090 | <b>&lt;0.001(&lt;0.001)</b> | 0.099 |
| Middle temporal                   | -0.014  | 0.069 | 0.843(0.843)        | 0.160 | -0.478  | 0.090 | <b>&lt;0.001(&lt;0.001)</b> | 0.093 |
| Ventricular                       | 0.112   | 0.065 | 0.083(0.176)        | 0.211 | 0.277   | 0.082 | <b>0.001(0.001)</b>         | 0.203 |
| Whole brain                       | -0.028  | 0.058 | 0.632(0.716)        | 0.350 | -0.360  | 0.081 | <b>&lt;0.001(&lt;0.001)</b> | 0.211 |
| <b>Cognitive measures</b>         |         |       |                     |       |         |       |                             |       |
| MMSE                              | -0.122  | 0.067 | 0.067(0.163)        | 0.026 | -0.372  | 0.084 | <b>&lt;0.001(&lt;0.001)</b> | 0.091 |
| CDR-SB                            | 0.044   | 0.067 | 0.514(0.672)        | 0.021 | 0.533   | 0.083 | <b>&lt;0.001(&lt;0.001)</b> | 0.124 |
| ADAS-Cog                          | 0.129   | 0.066 | 0.05(0.17)          | 0.053 | 0.534   | 0.083 | <b>&lt;0.001(&lt;0.001)</b> | 0.115 |
| Memory composite                  | -0.179  | 0.062 | 0.004(0.075)        | 0.145 | -0.584  | 0.080 | <b>&lt;0.001(&lt;0.001)</b> | 0.182 |
| EF composite                      | -0.080  | 0.063 | 0.206(0.318)        | 0.121 | -0.457  | 0.083 | <b>&lt;0.001(&lt;0.001)</b> | 0.117 |
| Language composite                | -0.031  | 0.064 | 0.626(0.76)         | 0.117 | -0.451  | 0.082 | <b>&lt;0.001(&lt;0.001)</b> | 0.131 |
| VS composite                      | -0.096  | 0.067 | 0.15(0.256)         | 0.020 | -0.276  | 0.087 | <b>0.002(0.002)</b>         | 0.038 |

Baseline levels of all other measures were normalized to have zero mean and unit variance so that effect sizes were directly comparable.

P values in parentheses are corrected for multiple comparisons by Benjamini-Hochberg procedure.

P values less than 0.05 were shown in bold.

Abbreviation: A $\beta$  =  $\beta$ -amyloid; AD = Alzheimer's disease; ADAS-Cog = Alzheimer Disease Assessment Scale-Cognitive Subscale; CDR-SB = Clinical Dementia Rating Scale Sum of Boxes; CSF = cerebrospinal fluid; EF = executive function; FDG = fluorodeoxyglucose; MCI = mild cognitive impairment; PET = positron emission tomography; p-tau = phosphorylated tau; t-tau = total tau; MMSE = mini-mental state examination; VS = visuospatial

**eTable 10. Association between longitudinal plasma p-tau181 and other baseline measures in different amyloid status**

|                                   | A-      |       |                     | A+    |         |       |                             |       |
|-----------------------------------|---------|-------|---------------------|-------|---------|-------|-----------------------------|-------|
|                                   | $\beta$ | s.e.  | P value             | R2    | $\beta$ | s.e.  | P value                     | R2    |
| <b>CSF biomarkers</b>             |         |       |                     |       |         |       |                             |       |
| A $\beta$ 42                      | -1.879  | 1.125 | 0.096(0.406)        | 0.034 | -2.448  | 1.096 | <b>0.026(0.049)</b>         | 0.120 |
| p-tau                             | 2.227   | 1.080 | <b>0.040(0.676)</b> | 0.109 | 3.364   | 1.091 | <b>0.002(0.018)</b>         | 0.128 |
| t-tau                             | 2.061   | 1.077 | 0.056(0.319)        | 0.115 | 2.732   | 1.088 | <b>0.012(0.03)</b>          | 0.133 |
| <b>PET imaging</b>                |         |       |                     |       |         |       |                             |       |
| A $\beta$ -PET                    | 2.282   | 1.165 | 0.051(0.431)        | 0.069 | 4.217   | 0.986 | <b>&lt;0.001(&lt;0.001)</b> | 0.102 |
| FDG-PET                           | -0.559  | 1.150 | 0.627(0.97)         | 0.096 | -2.783  | 1.056 | <b>0.009(0.049)</b>         | 0.028 |
| <b>Structure imaging (volume)</b> |         |       |                     |       |         |       |                             |       |
| Hippocampal                       | -0.645  | 1.100 | 0.558(1.185)        | 0.259 | -1.513  | 1.064 | 0.156(0.166)                | 0.168 |
| Entorhinal                        | 0.378   | 1.235 | 0.760(0.994)        | 0.038 | -2.209  | 1.155 | 0.056(0.074)                | 0.061 |
| Middle temporal                   | -1.920  | 1.151 | 0.096(0.327)        | 0.165 | -2.315  | 1.165 | <b>0.047(0.081)</b>         | 0.046 |
| Ventricular *                     | -0.559  | 1.150 | 0.627(1.067)        | 0.096 | -2.783  | 1.056 | <b>0.009(0.037)</b>         | 0.028 |
| Whole brain                       | -0.712  | 0.870 | 0.414(1.005)        | 0.350 | -2.611  | 1.014 | <b>0.01(0.029)</b>          | 0.191 |
| <b>Cognitive measures</b>         |         |       |                     |       |         |       |                             |       |
| MMSE                              | -0.607  | 1.048 | 0.563(1.063)        | 0.020 | -0.728  | 1.001 | 0.468(0.468)                | 0.061 |
| CDR-SB                            | 0.265   | 1.048 | 0.800(0.907)        | 0.020 | 2.594   | 0.997 | <b>0.009(0.032)</b>         | 0.072 |
| ADAS-Cog                          | 0.035   | 1.039 | 0.973(0.973)        | 0.046 | 1.967   | 1.003 | <b>0.050(0.078)</b>         | 0.058 |
| Memory composite                  | -0.474  | 0.987 | 0.631(0.894)        | 0.132 | -1.749  | 0.975 | 0.073(0.083)                | 0.111 |
| EF composite                      | -1.261  | 0.993 | 0.205(0.580)        | 0.121 | -2.464  | 0.991 | <b>0.013(0.028)</b>         | 0.081 |
| Language composite                | 0.159   | 0.996 | 0.873(0.928)        | 0.116 | -1.785  | 0.985 | 0.071(0.086)                | 0.091 |
| VS composite                      | -0.292  | 1.050 | 0.781(0.948)        | 0.017 | -1.983  | 1.019 | 0.052(0.074)                | 0.027 |

Baseline levels of all other measures were normalized to have zero mean and unit variance so that effect sizes were directly comparable.

P values in parentheses are corrected for multiple comparisons by Benjamini-Hochberg procedure.

P values less than 0.05 were shown in bold.

Abbreviation: A $\beta$  =  $\beta$ -amyloid; AD = Alzheimer's disease; ADAS-Cog = Alzheimer Disease Assessment Scale-Cognitive Subscale; CDR-SB = Clinical Dementia Rating Scale Sum of Boxes; CSF = cerebrospinal fluid; EF = executive function; FDG = fluorodeoxyglucose; MCI = mild cognitive impairment; PET = positron emission tomography; p-tau = phosphorylated tau; t-tau = total tau; MMSE = mini-mental state examination; VS = visuospatial

**eTable 11. Association between longitudinal plasma p-tau181 and other measures at baseline across diagnostic groups**

|                           | CN      |       |                     | MCI   |         |       |                         | Dementia |         |       |                     |        |
|---------------------------|---------|-------|---------------------|-------|---------|-------|-------------------------|----------|---------|-------|---------------------|--------|
|                           | $\beta$ | s.e.  | P value             | R2    | $\beta$ | s.e.  | P value                 | R2       | $\beta$ | s.e.  | P value             | R2     |
| <b>CSF biomarkers</b>     |         |       |                     |       |         |       |                         |          |         |       |                     |        |
| A $\beta$ 42              | -2.674  | 1.309 | 0.042(0.357)        | 0.150 | -2.799  | 0.900 | <b>0.00(0.017)</b>      | 0.309    | -2.172  | 2.297 | 0.346(0.588)        | 0.150  |
| p-tau                     | 2.491   | 1.335 | 0.063(0.357)        | 0.117 | 1.599   | 0.973 | 0.101(0.143)            | 0.194    | 7.949   | 2.284 | <b>0.001(0.011)</b> | 0.159  |
| t-tau                     | 2.420   | 1.343 | 0.073(0.309)        | 0.106 | 0.787   | 0.981 | 0.423(0.423)            | 0.179    | 7.002   | 2.311 | <b>0.003(0.024)</b> | 0.139  |
| <b>PET imaging</b>        |         |       |                     |       |         |       |                         |          |         |       |                     |        |
| AV45                      | 5.785   | 1.482 | <b>0.001(0.002)</b> | 0.177 | 3.107   | 0.845 | <b>&lt;0.001(0.004)</b> | 0.247    | 5.834   | 2.027 | <b>0.005(0.025)</b> | 0.189  |
| FDG-PET                   | 0.791   | 1.588 | 0.619(0.877)        | 0.044 | -2.372  | 0.926 | <b>0.011(0.037)</b>     | 0.107    | -2.989  | 2.357 | 0.207(0.502)        | 0.018  |
| <b>Structure imaging</b>  |         |       |                     |       |         |       |                         |          |         |       |                     |        |
| Hippocampus               | 0.778   | 1.387 | 0.575(0.889)        | 0.250 | -1.415  | 0.911 | 0.121(0.158)            | 0.260    | 1.881   | 2.204 | 0.395(0.610)        | 0.223  |
| Entorhinal                | -0.131  | 1.565 | 0.933(0.933)        | 0.047 | -0.950  | 1.034 | 0.359(0.436)            | 0.044    | -2.513  | 2.575 | 0.331(0.625)        | 0.021  |
| Mid temporal              | 0.961   | 1.465 | 0.512(0.870)        | 0.180 | -1.690  | 0.985 | 0.087(0.134)            | 0.134    | 3.423   | 2.463 | 0.167(0.473)        | 0.097  |
| Ventricular volume        | 0.163   | 1.172 | 0.889(0.945)        | 0.209 | 2.336   | 0.855 | <b>0.006(0.037)</b>     | 0.302    | -0.021  | 2.272 | 0.993(0.993)        | 0.151  |
| Whole brain               | 0.280   | 1.037 | 0.787(0.956)        | 0.368 | -1.723  | 0.823 | 0.037(0.070)            | 0.332    | 0.625   | 2.316 | 0.787(0.956)        | 0.095  |
| <b>Cognitive measures</b> |         |       |                     |       |         |       |                         |          |         |       |                     |        |
| MMSE                      | 1.840   | 1.236 | 0.137(0.334)        | 0.048 | -0.745  | 0.899 | 0.408(0.433)            | 0.097    | -0.838  | 2.151 | 0.697(0.911)        | -0.002 |
| CDR-SB                    | -2.148  | 1.260 | 0.089(0.303)        | 0.013 | 2.419   | 0.936 | <b>0.010(0.043)</b>     | 0.023    | 3.678   | 2.080 | 0.079(0.267)        | 0.066  |
| ADAS-Cog                  | 1.840   | 1.192 | 0.123(0.350)        | 0.112 | 0.779   | 0.908 | 0.391(0.444)            | 0.087    | 2.457   | 2.148 | 0.254(0.540)        | 0.006  |
| Memory composite          | 0.307   | 1.149 | 0.790(0.895)        | 0.179 | -2.045  | 0.848 | <b>0.016(0.046)</b>     | 0.197    | -0.379  | 2.144 | 0.860(0.914)        | 0.007  |
| EF composite              | -1.164  | 1.177 | 0.323(0.687)        | 0.136 | -2.038  | 0.847 | <b>0.016(0.040)</b>     | 0.200    | -5.006  | 2.119 | 0.019(0.081)        | 0.030  |
| Language composite        | 0.878   | 1.202 | 0.466(0.880)        | 0.101 | -2.011  | 0.853 | <b>0.018(0.040)</b>     | 0.188    | -0.424  | 2.103 | 0.841(0.953)        | 0.045  |
| VS composite              | 0.463   | 1.255 | 0.712(0.931)        | 0.018 | -1.774  | 0.927 | 0.056(0.096)            | 0.040    | -1.543  | 2.154 | 0.475(0.672)        | -0.002 |

Baseline levels and rates of change of all other measures were normalized to have zero mean and unit variance so that effect sizes were directly comparable. P values in parentheses are corrected for multiple comparisons by Benjamini-Hochberg procedure. Abbreviation: A $\beta$  =  $\beta$ -amyloid; AD = Alzheimer's disease; ADAS-Cog = Alzheimer Disease Assessment Scale-Cognitive Subscale; CDR-SB = Clinical Dementia Rating Scale Sum of Boxes; CSF = cerebrospinal fluid; EF = executive function; FDG = fluorodeoxyglucose; MCI = mild cognitive impairment; PET = positron emission tomography; p-tau = phosphorylated tau; t-tau = total tau; MMSE = mini-mental state examination; VS = visuospatial

**eTable 12. Correlations of concurrent changes in plasma p-tau181 and other measures in different amyloid status.**

|                                   | A-     |                     | A+     |                         |
|-----------------------------------|--------|---------------------|--------|-------------------------|
|                                   | $\rho$ | P value             | $\rho$ | P value                 |
| <b>CSF biomarkers</b>             |        |                     |        |                         |
| A $\beta$ 42                      | 0.053  | 0.263(0.498)        | 0.036  | 0.417(0.472)            |
| p-tau                             | 0.060  | 0.205(0.436)        | 0.173  | <b>&lt;0.001(0.001)</b> |
| t-tau                             | 0.074  | 0.118(0.288)        | 0.172  | <b>&lt;0.001(0.001)</b> |
| <b>PET imaging</b>                |        |                     |        |                         |
| A $\beta$ -PET                    | 0.027  | 0.546(0.714)        | 0.088  | <b>0.037(0.049)</b>     |
| FDG-PET                           | 0.024  | 0.587(0.713)        | -0.123 | <b>0.003(0.013)</b>     |
| <b>Structure imaging (volume)</b> |        |                     |        |                         |
| Hippocampal                       | -0.103 | <b>0.021(0.117)</b> | 0.002  | 0.962(0.962)            |
| Entorhinal                        | -0.010 | 0.825(0.876)        | 0.028  | 0.519(0.551)            |
| Middle temporal                   | -0.099 | <b>0.029(0.098)</b> | -0.095 | <b>0.026(0.040)</b>     |
| Ventricular                       | 0.101  | <b>0.024(0.102)</b> | 0.120  | <b>0.004(0.014)</b>     |
| Whole brain                       | -0.150 | <b>0.001(0.012)</b> | -0.102 | <b>0.014(0.027)</b>     |
| <b>Cognitive measures</b>         |        |                     |        |                         |
| MMSE                              | -0.043 | 0.332(0.47)         | -0.087 | <b>0.035(0.050)</b>     |
| CDR-SB                            | 0.022  | 0.619(0.702)        | 0.063  | 0.131(0.159)            |
| ADAS-Cog                          | 0.044  | 0.318(0.541)        | 0.111  | <b>0.008(0.018)</b>     |
| Memory composite                  | -0.125 | <b>0.005(0.041)</b> | -0.114 | <b>0.006(0.017)</b>     |
| EF composite                      | -0.075 | 0.093(0.263)        | -0.151 | <b>&lt;0.001(0.001)</b> |
| Language composite                | 0.005  | 0.919(0.919)        | -0.109 | <b>0.009(0.019)</b>     |
| VS                                | -0.043 | 0.327(0.506)        | -0.101 | <b>0.015(0.025)</b>     |

P values in parentheses were corrected for multiple comparisons by Benjamini-Hochberg procedure.

P values less than 0.05 were shown in bold.

Abbreviation: A $\beta$  =  $\beta$ -amyloid; AD = Alzheimer's disease; ADAS-Cog = Alzheimer Disease Assessment Scale-Cognitive Subscale; CDR-SB = Clinical Dementia Rating Scale Sum of Boxes; CSF = cerebrospinal fluid; EF = executive function; FDG = fluorodeoxyglucose; MCI = mild cognitive impairment; PET = positron emission tomography; p-tau = phosphorylated tau; t-tau = total tau; MMSE = mini-mental state examination; VS = visuospatial

**eTable 13. Correlations of concurrent changes in plasma p-tau181 and other measures across diagnostic groups**

|                           | CN     |                         | MCI    |                     | Dementia |                     |
|---------------------------|--------|-------------------------|--------|---------------------|----------|---------------------|
|                           | $\rho$ | P value                 | $\rho$ | P value             | $\rho$   | P value             |
| <b>CSF biomarkers</b>     |        |                         |        |                     |          |                     |
| A $\beta$ 42              | -0.020 | 0.727(0.823)            | 0.851  | 0.062(0.095)        | 0.154    | 0.044(0.082)        |
| p-tau                     | 0.093  | 0.094(0.177)            | 0.133  | <b>0.004(0.029)</b> | 0.212    | <b>0.005(0.018)</b> |
| t-tau                     | 0.099  | 0.076(0.162)            | 0.131  | <b>0.004(0.016)</b> | 0.194    | <b>0.011(0.030)</b> |
| <b>PET imaging</b>        |        |                         |        |                     |          |                     |
| AV45                      | 0.164  | <b>0.002(0.009)</b>     | 0.084  | 0.054(0.092)        | 0.021    | 0.779(0.827)        |
| FDG-PET                   | -0.050 | 0.330(0.467)            | -0.035 | 0.418(0.474)        | -0.149   | <b>0.035(0.073)</b> |
| <b>Structure imaging</b>  |        |                         |        |                     |          |                     |
| Hippocampus               | -0.101 | 0.043(0.122)            | -0.031 | 0.459(0.488)        | -0.097   | 0.163(0.231)        |
| Entorhinal                | 0.018  | 0.723(0.878)            | -0.006 | 0.894(0.894)        | 0.012    | 0.871(0.871)        |
| Mid temporal              | -0.101 | 0.046(0.112)            | -0.084 | 0.052(0.056)        | -0.139   | 0.0561(0.096)       |
| Ventricular volumn        | 0.132  | <b>0.009(0.003)</b>     | 0.123  | <b>0.004(0.020)</b> | 0.088    | 0.202(0.264)        |
| Whole brain               | -0.186 | <b>0.001(0.002)</b>     | -0.106 | <b>0.012(0.041)</b> | -0.073   | 0.2862(0.348)       |
| <b>Cognitive measures</b> |        |                         |        |                     |          |                     |
| MMSE                      | -0.063 | 0.208(0.322)            | -0.083 | 0.050(0.122)        | -0.106   | 0.116(0.178)        |
| CDR-SB                    | 0.008  | 0.873(0.927)            | 0.068  | 0.106(0.150)        | 0.068    | 0.313(0.354)        |
| ADAS-Cog                  | 0.132  | <b>0.008(0.033)</b>     | 0.065  | 0.122(0.160)        | 0.200    | <b>0.003(0.016)</b> |
| Memory composite          | -0.195 | <b>&lt;0.001(0.002)</b> | -0.094 | <b>0.027(0.077)</b> | -0.208   | <b>0.002(0.033)</b> |
| EF composite              | -0.070 | 0.163(0.277)            | -0.137 | <b>0.001(0.019)</b> | -0.156   | <b>0.021(0.051)</b> |
| Language composite        | 0.008  | 0.879(0.879)            | -0.083 | 0.052(0.109)        | -0.194   | <b>0.004(0.017)</b> |
| VS composite              | -0.046 | 0.3576(0.467)           | -0.042 | 0.316(0.384)        | -0.208   | <b>0.002(0.016)</b> |

P values in parentheses were corrected for multiple comparisons by Benjamini-Hochberg procedure.

P values less than 0.05 were shone in bold.

Abbreviation: A $\beta$  =  $\beta$ -amyloid; AD = Alzheimer's disease; ADAS-Cog = Alzheimer Disease Assessment Scale-Cognitive Subscale; CDR-SB = Clinical Dementia Rating Scale Sum of Boxes; CSF = cerebrospinal fluid; EF = executive function; FDG = fluorodeoxyglucose; MCI = mild cognitive impairment; PET = positron emission tomography; p-tau = phosphorylated tau; t-tau = total tau; MMSE = mini-mental state examination; VS = visuospatial
